# Supplementary material for: Stable nitrogen-rich scandium nitrides and their bonding features under ambient conditions
Source: Royal Society of Chemistry journal article supplement (doi:10.1039/d0cp05402j), 2021-01-01
Supplement: d0cp05402j2.pdf [file d0cp05402j2.pdf]

## Supporting Information

### Stable nitrogen-rich scandium nitrides and their bonding features at Ambient Conditions

Jiani Lin<sup>a,b</sup>, Dong Peng<sup>b</sup>, Qinglin Wang<sup>c</sup>, Jianfu Li<sup>a,\*</sup>, Hongyang Zhu<sup>b</sup> and Xiaoli Wang<sup>a,\*</sup>

<sup>a</sup> School of Opto-electronic Information Science and Technology, Yantai University, Yantai 264005, PR China

<sup>b</sup> School of Physics and Electronic Engineering, Linyi University, 276005, Linyi, PR China.

<sup>c</sup> School of Physical Science and Information Technology, Shandong Key Laboratory of Optical Communication Science and Technology, Liaocheng University, 252059, Liaocheng, PR China.

\* Corresponding author. Email address: [lijianfu@lyu.edu.cn](mailto:lijianfu@lyu.edu.cn) (Jianfu Li), [wxl@lyu.edu.cn](mailto:wxl@lyu.edu.cn) (Xiaoli Wang)

## Supplementary Figures

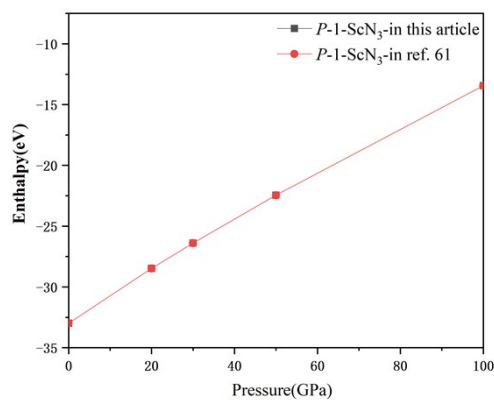

Figure. S1. Calculated enthalpies per formula unit (f.u.) of  $\text{ScN}_3$

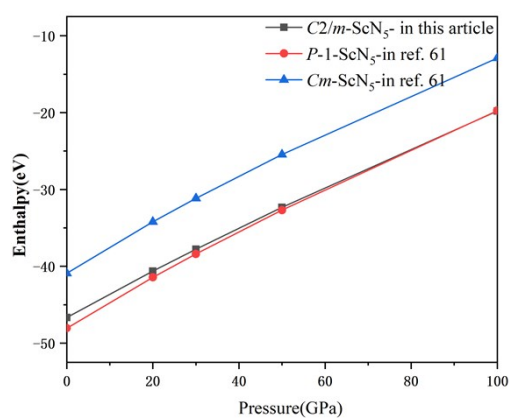

Figure. S2. Calculated enthalpies per formula unit (f.u.) of  $\text{ScN}_5$

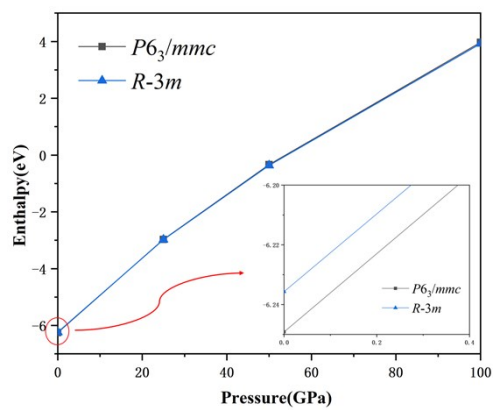

| the Calculated enthalpies per formula unit (f.u.) of Sc at 0GPa |             |
|-----------------------------------------------------------------|-------------|
| $P6_3/mmc$                                                      | $R-3m$      |
| -6.2491595                                                      | -6.23567177 |

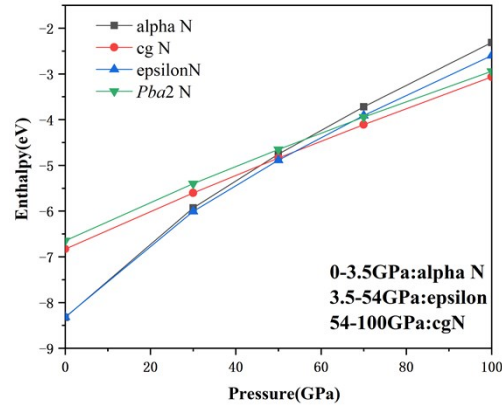

Figure. S3. The phases transition of Sc and N

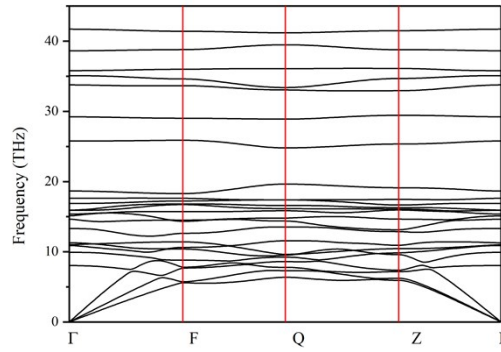

Figure. S4. Phonon dispersion curves of  $P-1-\text{ScN}_3$  at 50 GPa.

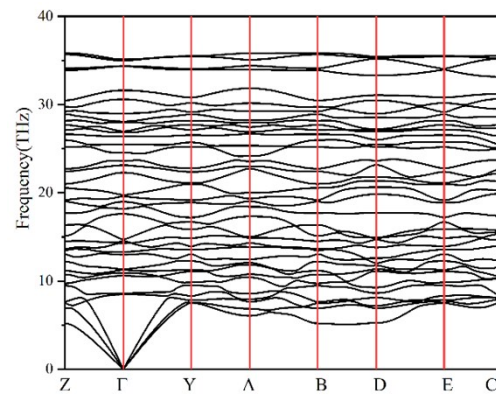

Figure. S5. Phonon dispersion curves of  $C2/m-\text{ScN}_5$  at 50 GPa

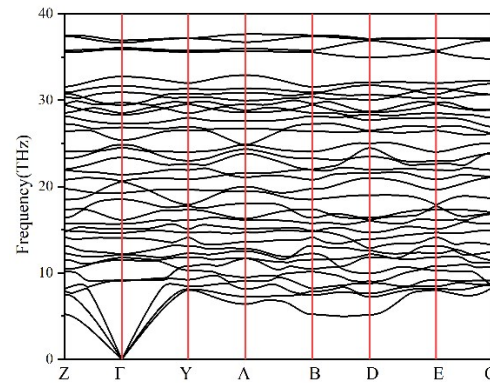

Figure. S6. Phonon dispersion curves of  $C2/m-\text{ScN}_5$  at 100 GPa

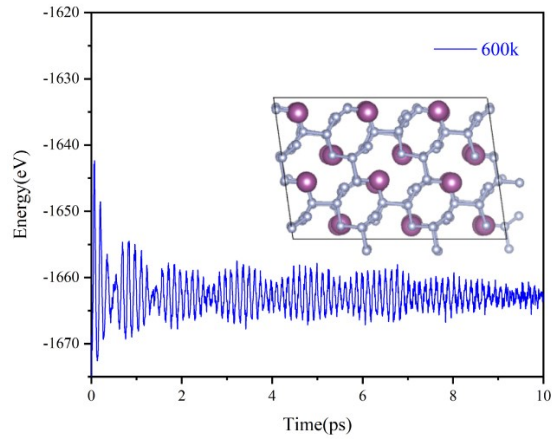

Figure. S7. Images for the equilibrium structures of  $C2/m$ - $ScN_5$  and fluctuations of the total energies at the end of 10 ps FPMD simulations at the temperatures of 600 K.

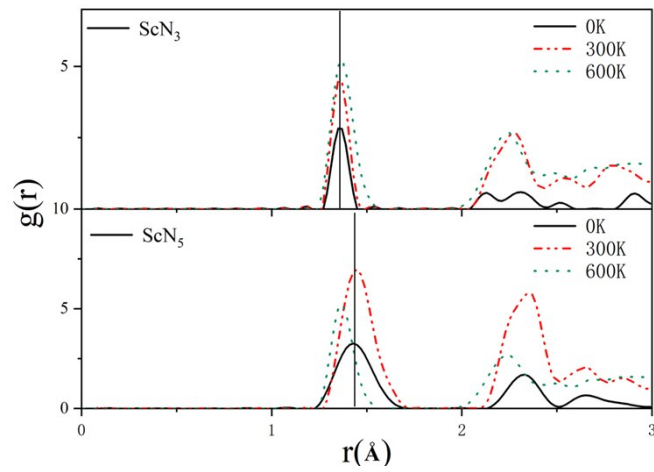

Figure. S8. The Radial Distribution Function curve for N-N separations of  $ScN_3$  and  $ScN_5$  at 0, 300 and 600K.

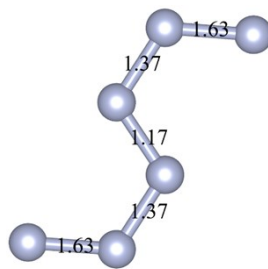

Figure. S9. The calculated bond order of  $N_6^{2-}$ .

## Supplementary table

Table S1. The unit-cell parameters and atomic positions of ScN<sub>3</sub> at 0 GPa

| Space group                                   | Lattice parameter (Å, °) | Atom | Wyckoff position | x       | y       | z       |
|-----------------------------------------------|--------------------------|------|------------------|---------|---------|---------|
| <i>P</i> -1-ScN <sub>3</sub> -in this article | a=4.7339                 | Sc   | 2i               | 0.27171 | 0.67387 | 0.83206 |
|                                               | b=5.0811                 | N1   | 2i               | 0.31088 | 0.15501 | 0.31762 |
|                                               | c=3.3573                 | N2   | 2i               | 0.13233 | 0.96986 | 0.47454 |
|                                               | α=101.1036               | N3   | 2i               | 0.21088 | 0.37783 | 0.22894 |
|                                               | β=91.9075<br>γ=99.7122   |      |                  |         |         |         |
| <i>P</i> -1-ScN <sub>3</sub> -in ref. 61      | a=4.6995                 | Sc   | 2i               | 0.77573 | 0.18049 | 0.35575 |
|                                               | b=5.1579                 | N1   | 2i               | 0.81631 | 0.66513 | 0.84693 |
|                                               | c=3.2640                 | N2   | 2i               | 0.36492 | 0.52667 | 0.01638 |
|                                               | α=100.8608               | N3   | 2i               | 0.70957 | 0.87685 | 0.73754 |
|                                               | β=93.7835<br>γ=99.6239   |      |                  |         |         |         |

Table S2. The calculated electronic energies, ZPE of predicted structures at 0 GPa.

|                                        | electronic energy(meV) | ZPE(meV) |
|----------------------------------------|------------------------|----------|
| <i>P</i> -1-ScN <sub>3</sub>           | -32.995                | 0.3931   |
| <i>C</i> 2/ <i>m</i> -ScN <sub>5</sub> | -46.669                | 0.35221  |

Table S3. The calculated distance, ICOHP and bond order of *P*-1-ScN<sub>3</sub> at 0 GPa.

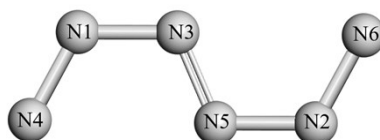

|               | distance(Å) | ICOHP (eV/pair) | Bond order |
|---------------|-------------|-----------------|------------|
| N4-N1 (N2-N6) | 1.3769      | -12.6981        | 1.63       |
| N1-N3 (N5-N2) | 1.3525      | -13.6447        | 1.37       |
| N3-N5         | 1.348       | -13.3009        | 1.17       |

Table S4. Calculated Bader charges for *P*-1-ScN<sub>3</sub> and *C*2/*m*-ScN<sub>5</sub> at 0 GPa

| Structure | Atom | Charge value(e) | δ(e) |
|-----------|------|-----------------|------|
|           | Sc1  | 9.2154          | 1.79 |
|           | Sc2  | 9.2154          | 1.79 |

|                                        |        |        |        |
|----------------------------------------|--------|--------|--------|
| <i>P</i> -1-ScN <sub>3</sub>           | N1     | 5.4579 | 0.45   |
|                                        | N2     | 5.4579 | 0.45   |
|                                        | N3     | 5.3642 | 0.36   |
|                                        | N4     | 5.3642 | 0.36   |
|                                        | N5     | 5.9609 | 0.96   |
|                                        | N6     | 5.9609 | 0.96   |
| <i>C</i> 2/ <i>m</i> -ScN <sub>5</sub> | Sc1    | 9.1262 | 1.874  |
|                                        | Sc2    | 9.1262 | 1.874  |
|                                        | N1     | 5.1553 | 0.1553 |
|                                        | N2     | 5.5686 | 0.5686 |
|                                        | N3     | 5.4965 | 0.4965 |
|                                        | N4     | 5.1555 | 0.1555 |
|                                        | N5     | 5.4979 | 0.4979 |
|                                        | N6     | 5.1558 | 0.1558 |
|                                        | N7     | 5.1548 | 0.1555 |
|                                        | N8     | 5.5686 | 0.5686 |
| N9                                     | 5.4965 | 0.4965 |        |
| N10                                    | 5.4979 | 0.4979 |        |

The calculation methods for orbitals and bond order

The calculations of orbitals and bond order were carried out with the Gaussian 09 package (G09d01 version) using B3LYP/6-311+(g,d).

Bond order is a measurement of the number of electrons involved in bonds between two atoms in a molecule.
